# Supplementary material for: Evaluation of the Effect of a Growing up Milk Lite vs. Cow’s Milk on Diet Quality and Dietary Intakes in Early Childhood: The Growing up Milk Lite (GUMLi) Randomised Controlled Trial
Source: PubMed Central journal article supplement (PMC6356321; doi:10.3390/nu11010203), 2019-01-20
Supplement: nutrients-11-00203-s001.pdf [file nutrients-11-00203-s001.pdf]

**Table S1.** PANDiet for Australian and New Zealand children aged from 18 to 23 months: components, reference values, and inter-individual variability <sup>1</sup>.

|                                      | Reference Value         | Variability      | Ref |
|--------------------------------------|-------------------------|------------------|-----|
| <b>Moderation sub-score</b>          |                         |                  |     |
| Protein                              | 3.5 g/kg                | 0%               |     |
| Total Fat                            | 40% of EI               | 0%               |     |
| Total Carbohydrate                   | 60% of EI               | 0%               |     |
| SFA                                  | 11 % of EI <sup>#</sup> | 15% <sup>#</sup> |     |
| NMES                                 | 11% of EI <sup>#</sup>  | 15% <sup>#</sup> |     |
| Sodium                               | 400 mg                  | 15%              |     |
| <b>Adequacy sub-score</b>            |                         |                  |     |
| Protein                              | 0.92 g/kg               | 12%              |     |
| Total Carbohydrate                   | 45% of EI <sup>#</sup>  | 0% <sup>#</sup>  |     |
| Total Fat                            | 35% of EI <sup>#</sup>  | 0% <sup>#</sup>  |     |
| PUFA                                 | 4.5 % of EI             | 15% <sup>#</sup> |     |
| Vitamin A                            | 210 µg                  | 20%              |     |
| Thiamin                              | 0.4 mg/1000 kcal        | 10%              |     |
| Riboflavin                           | 0.4 mg                  | 10%              |     |
| Niacin                               | 5 mg/1000 kcal          | 15%              |     |
| Vitamin B <sub>6</sub>               | 15 µg/g protein         | 10%              |     |
| Folate                               | 120 µg                  | 10%              |     |
| Vitamin B <sub>12</sub>              | 0.7 µg                  | 10%              |     |
| Vitamin C                            | 25 mg                   | 20%              |     |
| Vitamin D                            | 5 µg                    | 15% <sup>#</sup> |     |
| Calcium                              | 360 mg                  | 15%              |     |
| Magnesium                            | 5.0mg/kg                | 10%              |     |
| Zinc                                 | 2.5 mg                  | 10%              |     |
| Phosphorus                           | 380 mg                  | 10%              |     |
| Potassium                            | 200 mg                  | 15% <sup>#</sup> |     |
| Iron                                 | 4 mg                    | 15% <sup>#</sup> |     |
| Copper                               | 0.7 mg                  | 15% <sup>#</sup> |     |
| Selenium                             | 20 µg                   | 10%              |     |
| Iodine                               | 65 µg                   | 20%              |     |
| <b>Tolerable Upper Intake Limits</b> |                         |                  |     |
| Retinol (vitamin A)                  | 600 µg                  |                  |     |
| Niacin                               | 250 mg                  |                  |     |
| Vitamin B-6                          | 15 mg                   |                  |     |
| Vitamin C                            | 400 mg                  |                  |     |
| Vitamin D                            | 80 µg                   |                  |     |
| Folate                               | 300 µg                  |                  |     |
| Calcium                              | 2, 500 mg               |                  |     |
| Zinc                                 | 7 mg                    |                  |     |
| Phosphorus                           | 3,000 mg                |                  |     |
| Iron                                 | 20 mg                   |                  |     |

<sup>1</sup> EI, Energy intake. Reference value refers to Australia and New Zealand nutritional recommendations including Estimated Average Requirement (EAR), adequate Intake (AI) or Acceptable Macronutrient Distribution Range, as appropriate (28).

#Data not available in New Zealand and Australian nutrient reference values.  
 Values obtained from Verger et al. (31) for U.K. children (33,34).  
 † Reference value obtained from the Institute of Medicine (IoM) upper limit  
 for protein in 1–3 year old children (35)

**Table S2.** Nutritional composition of CM and GUMLi per 100 mL of prepared product.

|                                                                     | Study Group             |                                 |
|---------------------------------------------------------------------|-------------------------|---------------------------------|
|                                                                     | Control CM <sup>1</sup> | Intervention GUMLi <sup>1</sup> |
| Energy (kJ)                                                         | 245.0                   | 249.0                           |
| (kcal)                                                              | 71.0                    | 60.0                            |
| <b>Macronutrients</b>                                               |                         |                                 |
| Protein (g)                                                         | 3.1                     | 1.7                             |
| Carbohydrate (g)                                                    | 4.5                     | 7.8                             |
| Total Fat (g)                                                       | 3.6                     | 1.9                             |
| Saturated (g)                                                       | 1.9                     | 1.3                             |
| Total n-3 long chain fatty acids (g)<br>(DHA+EPA+DPA <sup>2</sup> ) | <0.002                  | 0.04                            |
| Dietary Fiber <sup>3</sup>                                          |                         |                                 |
| scGOS (g)                                                           | 0.0                     | 1.8                             |
| lcFOS (g)                                                           | 0.0                     | 0.2                             |
| <b>Micronutrients</b>                                               |                         |                                 |
| Sodium (mg)                                                         | 24.7                    | 19.0                            |
| Calcium (mg)                                                        | 96.7                    | 116.0                           |
| Phosphorus (mg)                                                     | 81.5                    | 94.0                            |
| Magnesium (mg)                                                      | 9.0                     | 11.0                            |
| Non heme iron (mg)                                                  | 0.0                     | 1.3                             |
| Zinc (mg)                                                           | 0.3                     | 0.5                             |
| Iodine (µg)                                                         | 2.4                     | 9.1                             |
| Vitamin A (µg REs)                                                  | 33.4                    | 27.0                            |
| Cholecalciferol (µg)                                                | 0.1                     | 1.2                             |
| dl-alpha-tocopherol (mg)                                            | 0.1                     | 1.3                             |
| Thiamin (mg)                                                        | 0.02                    | 0.1                             |
| Riboflavin (µg)                                                     | 193.8                   | 137.0                           |
| Vitamin B-6 (µg)                                                    | 0.5                     | 139.0                           |
| Vitamin B-12 (µg)                                                   | 0.42                    | 0.14                            |
| Niacin (µg)                                                         | 0.1                     | 1.0                             |
| Folic acid (µg)                                                     | 0.5                     | 20.0                            |
| Vitamin C (mg)                                                      | 0.0                     | 17.0                            |

<sup>1</sup>Obtained from manufacturer (Danone), values based on average totals from three batches produced for use in the GUMLi trial.

<sup>2</sup>DHA: Docosahexaenoic acid; EPA: Eicosapentaenoic acid; DPA: Docosapentaenoic acid.

<sup>3</sup>scGOS: Short-chain galacto-oligosaccharides; lcFOS: Long-chain fructo-oligosaccharides.

**Table S3.** Characteristics of the Auckland cohort included versus excluded in the PANDiet analysis.

|                                                  | Auckland Participants       |                             | P*           |
|--------------------------------------------------|-----------------------------|-----------------------------|--------------|
|                                                  | Included<br>(N=83)<br>n (%) | Excluded<br>(N=25)<br>n (%) |              |
| <b>Baseline demographics</b>                     |                             |                             |              |
| <b>Child's sex</b>                               |                             |                             | 0.765        |
| Boy                                              | 47 (57)                     | 15 (60)                     |              |
| Girl                                             | 36 (43)                     | 10 (40)                     |              |
| <b>Other children in the family</b>              |                             |                             | 0.585        |
| No                                               | 38 (46)                     | 13 (52)                     |              |
| Yes                                              | 45 (54)                     | 12 (48)                     |              |
| <b>Day care attendance</b>                       |                             |                             | 0.464        |
| No                                               | 50 (60)                     | 13 (52)                     |              |
| Yes                                              | 33 (40)                     | 12 (48)                     |              |
| <b>Breastfed at baseline</b>                     |                             |                             | 0.522        |
| No                                               | 51 (61)                     | 13 (54)                     |              |
| Yes                                              | 32 (39)                     | 11 (46)                     |              |
| Missing                                          |                             | 1                           |              |
| <b>Mother's Ethnicity</b>                        |                             |                             | 0.196        |
| Māori                                            | 14 (17)                     | 1 (4)                       |              |
| Pacific                                          | 1 (1)                       | 1 (4)                       |              |
| Asian                                            | 5 (6)                       | 1 (4)                       |              |
| European                                         | 49 (59)                     | 20 (80)                     |              |
| Other                                            | 14 (17)                     | 2 (8)                       |              |
| <b>Mother's Age, years (mean ± SD)</b>           | 32 (5)                      | 30 (6)                      | 0.102        |
| <b>Mother's BMI, kgm<sup>2</sup> (mean ± SD)</b> | 27 (6)                      | 27 (5)                      | 0.957        |
| <b>Mother's Highest Level of Education</b>       |                             |                             | <b>0.047</b> |
| No school qualifications                         | 0 (0)                       | 0 (0)                       |              |
| Primary                                          | 2 (2)                       | 0 (0)                       |              |
| Secondary                                        | 12 (14)                     | 10 (40)                     |              |
| Tertiary                                         | 66 (80)                     | 15 (60)                     |              |
| Other                                            | 3 (4)                       | 0 (0)                       |              |
| <b>Mother's Employment Status</b>                |                             |                             | 0.136        |
| Full-time caregiver                              | 29 (35)                     | 7 (28)                      |              |
| Full-time paid employment                        | 18 (22)                     | 7 (28)                      |              |
| Part-time paid employment                        | 27 (33)                     | 6 (24)                      |              |
| Receiving a benefit                              | 1 (1)                       | 2 (8)                       |              |
| Unemployed, not receiving a benefit              | 3 (4)                       | 2 (8)                       |              |
| Other                                            | 5 (6)                       | 0 (0)                       |              |
| Prefer not to answer                             | 0 (0)                       | 1 (4)                       |              |
| <b>Smoking</b>                                   |                             |                             |              |
| Current smoking                                  | 2 (2)                       | 0 (0)                       | 1.000        |
| Smoking before pregnancy                         | 7 (8)                       | 2 (8)                       | 1.000        |
| Smoking during pregnancy                         | 1 (1)                       | 1 (4)                       | 0.411        |

\*Chi-square test or Fisher's Exact test is used to test the difference between groups for categorical variables; the Kruskal-Wallis test or two-sample t-test is used to compare the medians/means between groups for continuous variables.

**Table S4.** Nutrient intake among Auckland children (N=83) from 18 and 23 months of age (month 7–11 post randomisation)<sup>1,2</sup>.

| Nutrients               | Intervention<br>(N=41)<br>Mean (SD) | Control (N=42)<br>Mean (SD) | Adjusted Difference<br>(95% CI) | P*           |
|-------------------------|-------------------------------------|-----------------------------|---------------------------------|--------------|
| <b>Energy, kcal</b>     |                                     |                             |                                 |              |
| Month 07                | 1135.92 (294.19)                    | 1122.34 (187.51)            | 36.61 (–93.18, 166.41)          | 0.579        |
| Month 08                | 1114.07 (277.52)                    | 1246.07 (378.83)            | –108.96 (–238.76, 20.84)        | 0.100        |
| Month 10                | 1128.31 (383.78)                    | 1068.61 (291.44)            | 82.74 (–47.05, 212.54)          | 0.210        |
| Month 11                | 1190.24 (288.14)                    | 1118.93 (283.21)            | 94.34 (–35.45, 224.14)          | 0.154        |
| <b>Carbohydrate, g</b>  |                                     |                             |                                 |              |
| Month 07                | 142.45 (40.53)                      | 127.44 (36.36)              | 18.26 (–0.25, 36.76)            | 0.053        |
| Month 08                | 138.50 (38.12)                      | 144.65 (56.59)              | –2.90 (–21.41, 15.61)           | 0.758        |
| Month 10                | 138.25 (45.72)                      | 123.41 (41.01)              | 18.09 (–0.42, 36.59)            | 0.055        |
| Month 11                | 145.81 (41.01)                      | 126.61 (43.06)              | 22.45 (3.94, 40.96)             | <b>0.018</b> |
| <b>Total fat, g</b>     |                                     |                             |                                 |              |
| Month 07                | 38.49 (13.70)                       | 43.91 (11.34)               | –4.69 (–11.04, 1.65)            | 0.146        |
| Month 08                | 37.76 (14.79)                       | 46.21 (16.22)               | –7.72 (–14.07, –1.37)           | <b>0.017</b> |
| Month 10                | 39.53 (17.61)                       | 40.34 (13.50)               | –0.08 (–6.42, 6.27)             | 0.981        |
| Month 11                | 43.99 (15.81)                       | 43.75 (13.59)               | 0.97 (–5.38, 7.32)              | 0.764        |
| <b>Saturated fat, g</b> |                                     |                             |                                 |              |
| Month 07                | 18.98 (7.37)                        | 21.16 (5.98)                | –1.96 (–5.27, 1.34)             | 0.243        |
| Month 08                | 18.11 (7.41)                        | 22.16 (8.16)                | –3.83 (–7.14, –0.53)            | <b>0.023</b> |
| Month 10                | 19.46 (8.88)                        | 19.73 (7.77)                | –0.05 (–3.35, 3.26)             | 0.977        |
| Month 11                | 20.93 (8.11)                        | 21.00 (6.84)                | 0.15 (–3.16, 3.45)              | 0.930        |
| <b>NMES, g</b>          |                                     |                             |                                 |              |
| Month 07                | 45.46 (18.22)                       | 42.02 (17.88)               | 4.33 (–5.27, 13.93)             | 0.375        |
| Month 08                | 45.90 (19.00)                       | 49.01 (30.16)               | –2.22 (–11.83, 7.38)            | 0.649        |
| Month 10                | 40.13 (23.17)                       | 39.00 (19.24)               | 2.03 (–7.58, 11.63)             | 0.678        |
| Month 11                | 48.53 (25.02)                       | 39.29 (21.47)               | 10.14 (0.54, 19.74)             | <b>0.039</b> |
| <b>Sodium, mg</b>       |                                     |                             |                                 |              |
| Month 07                | 1174.83 (656.71)                    | 1113.54 (477.98)            | 84.96 (–186.02, 355.93)         | 0.537        |
| Month 08                | 1169.36 (582.85)                    | 1445.92 (688.80)            | –252.89 (–523.87, 18.09)        | 0.067        |
| Month 10                | 1205.99 (683.53)                    | 1133.67 (708.06)            | 95.98 (–175.00, 366.96)         | 0.486        |
| Month 11                | 1280.76 (497.31)                    | 1271.69 (658.78)            | 32.74 (–238.24, 303.71)         | 0.812        |
| <b>Protein, g</b>       |                                     |                             |                                 |              |
| Month 07                | 46.07 (17.15)                       | 50.13 (10.13)               | –3.26 (–9.65, 3.13)             | 0.316        |
| Month 08                | 46.09 (14.01)                       | 56.47 (17.08)               | –9.58 (–15.97, –3.19)           | <b>0.004</b> |
| Month 10                | 46.45 (18.34)                       | 44.33 (12.51)               | 2.92 (–3.47, 9.31)              | 0.369        |
| Month 11                | 44.59 (14.36)                       | 47.48 (13.13)               | –2.09 (–8.48, 4.30)             | 0.520        |
| <b>PUFA, g</b>          |                                     |                             |                                 |              |
| Month 07                | 3.69 (1.68)                         | 4.30 (2.06)                 | –0.44 (–1.48, 0.60)             | 0.404        |
| Month 08                | 4.30 (2.29)                         | 4.72 (3.92)                 | –0.26 (–1.29, 0.78)             | 0.623        |

|                        |                 |                 |                          |                   |
|------------------------|-----------------|-----------------|--------------------------|-------------------|
| Month 10               | 4.07 (1.69)     | 3.87 (2.17)     | 0.37 (-0.67, 1.40)       | 0.484             |
| Month 11               | 5.10 (2.43)     | 4.34 (2.29)     | 0.92 (-0.11, 1.96)       | 0.080             |
| <b>Vitamin A, µg</b>   |                 |                 |                          |                   |
| Month 07               | 600.40 (400.47) | 571.78 (267.69) | 15.37 (-106.56, 137.30)  | 0.804             |
| Month 08               | 498.73 (321.17) | 513.25 (245.67) | -27.76 (-149.70, 94.17)  | 0.654             |
| Month 10               | 481.32 (237.81) | 479.52 (263.98) | -11.45 (-133.38, 110.48) | 0.853             |
| Month 11               | 444.69 (236.56) | 485.73 (235.35) | -54.28 (-176.21, 67.65)  | 0.381             |
| <b>Thiamin, mg</b>     |                 |                 |                          |                   |
| Month 07               | 1.50 (0.63)     | 1.19 (0.84)     | 0.34 (0.03, 0.64)        | <b>0.030</b>      |
| Month 08               | 1.54 (0.56)     | 1.29 (0.72)     | 0.28 (-0.02, 0.59)       | 0.069             |
| Month 10               | 1.35 (0.70)     | 1.03 (0.82)     | 0.36 (0.05, 0.66)        | <b>0.022</b>      |
| Month 11               | 1.36 (0.68)     | 0.99 (0.64)     | 0.40 (0.10, 0.71)        | <b>0.010</b>      |
| <b>Riboflavin, mg</b>  |                 |                 |                          |                   |
| Month 07               | 1.82 (0.64)     | 2.12 (0.64)     | -0.29 (-0.56, -0.02)     | <b>0.037</b>      |
| Month 08               | 1.71 (0.54)     | 2.30 (0.77)     | -0.58 (-0.85, -0.30)     | <b>&lt;0.0001</b> |
| Month 10               | 1.66 (0.50)     | 2.07 (0.67)     | -0.39 (-0.66, -0.11)     | <b>0.006</b>      |
| Month 11               | 1.63 (0.61)     | 2.11 (0.57)     | -0.47 (-0.74, -0.20)     | <b>0.001</b>      |
| <b>Niacin, mg</b>      |                 |                 |                          |                   |
| Month 07               | 19.97 (7.25)    | 17.79 (4.64)    | 2.49 (-0.12, 5.09)       | 0.061             |
| Month 08               | 20.63 (5.18)    | 20.09 (7.30)    | 0.85 (-1.75, 3.45)       | 0.521             |
| Month 10               | 19.34 (6.64)    | 15.80 (5.87)    | 3.84 (1.24, 6.45)        | <b>0.004</b>      |
| Month 11               | 19.09 (5.31)    | 17.28 (5.39)    | 2.11 (-0.49, 4.71)       | 0.112             |
| <b>Vitamin B6, mg</b>  |                 |                 |                          |                   |
| Month 07               | 0.99 (0.57)     | 1.07 (0.54)     | -0.07 (-0.30, 0.15)      | 0.524             |
| Month 08               | 1.05 (0.47)     | 1.28 (0.79)     | -0.22 (-0.44, 0.01)      | 0.059             |
| Month 10               | 0.89 (0.43)     | 0.98 (0.43)     | -0.07 (-0.30, 0.15)      | 0.514             |
| Month 11               | 0.96 (0.39)     | 1.01 (0.38)     | -0.04 (-0.26, 0.18)      | 0.724             |
| <b>Folate, µg</b>      |                 |                 |                          |                   |
| Month 07               | 232.46 (113.43) | 242.49 (143.98) | -6.57 (-68.96, 55.82)    | 0.836             |
| Month 08               | 259.78 (166.42) | 274.67 (134.44) | -11.44 (-73.83, 50.95)   | 0.718             |
| Month 10               | 204.29 (144.77) | 257.42 (171.64) | -49.68 (-112.07, 12.71)  | 0.118             |
| Month 11               | 240.27 (164.95) | 224.85 (87.87)  | 18.87 (-43.52, 81.26)    | 0.552             |
| <b>Vitamin B12, µg</b> |                 |                 |                          |                   |
| Month 07               | 2.36 (1.12)     | 2.78 (1.09)     | -0.41 (-0.91, 0.09)      | 0.108             |
| Month 08               | 2.25 (1.30)     | 3.17 (1.55)     | -0.91 (-1.41, -0.41)     | <b>0.0004</b>     |
| Month 10               | 2.14 (0.94)     | 2.57 (0.93)     | -0.42 (-0.92, 0.07)      | 0.095             |
| Month 11               | 2.03 (0.91)     | 2.58 (1.15)     | -0.55 (-1.05, -0.05)     | <b>0.031</b>      |
| <b>Vitamin C, mg</b>   |                 |                 |                          |                   |
| Month 07               | 104.00 (44.39)  | 45.38 (37.36)   | 57.38 (35.76, 79.01)     | <b>&lt;0.0001</b> |
| Month 08               | 99.95 (39.44)   | 50.22 (54.71)   | 48.48 (26.86, 70.11)     | <b>&lt;0.0001</b> |
| Month 10               | 92.84 (34.62)   | 50.54 (65.97)   | 41.05 (19.43, 62.68)     | <b>0.0002</b>     |
| Month 11               | 92.51 (48.54)   | 58.80 (61.49)   | 32.47 (10.85, 54.10)     | <b>0.003</b>      |
| <b>Vitamin D, µg</b>   |                 |                 |                          |                   |
| Month 07               | 6.02 (6.57)     | 3.23 (3.18)     | 2.80 (1.07, 4.53)        | <b>0.002</b>      |
| Month 08               | 4.73 (2.70)     | 3.59 (4.00)     | 1.16 (-0.57, 2.89)       | 0.188             |
| Month 10               | 5.17 (2.76)     | 2.92 (2.49)     | 2.27 (0.54, 4.00)        | <b>0.011</b>      |
| Month 11               | 4.86 (3.44)     | 3.73 (4.75)     | 1.15 (-0.58, 2.88)       | 0.194             |
| <b>Calcium, mg</b>     |                 |                 |                          |                   |

|                       |                  |                  |                            |                   |
|-----------------------|------------------|------------------|----------------------------|-------------------|
| Month 07              | 901.26 (268.15)  | 898.06 (287.37)  | 8.15 (-113.76, 130.06)     | 0.895             |
| Month 08              | 808.31 (257.94)  | 943.49 (314.09)  | -130.24 (-252.15, -8.33)   | <b>0.036</b>      |
| Month 10              | 899.34 (284.54)  | 836.03 (251.58)  | 68.25 (-53.65, 190.16)     | 0.271             |
| Month 11              | 830.41 (284.29)  | 891.05 (280.79)  | -55.70 (-177.60, 66.21)    | 0.369             |
| <b>Magnesium, mg</b>  |                  |                  |                            |                   |
| Month 07              | 190.42 (59.23)   | 192.43 (50.27)   | 0.93 (-22.60, 24.46)       | 0.938             |
| Month 08              | 186.24 (54.21)   | 206.19 (70.46)   | -17.01 (-40.54, 6.52)      | 0.156             |
| Month 10              | 181.27 (52.24)   | 169.37 (43.16)   | 14.84 (-8.70, 38.37)       | 0.216             |
| Month 11              | 189.36 (55.05)   | 178.23 (46.71)   | 14.06 (-9.47, 37.60)       | 0.240             |
| <b>Zinc (mg)</b>      |                  |                  |                            |                   |
| Month 07              | 6.75 (2.76)      | 6.11 (1.51)      | 0.71 (-0.22, 1.64)         | 0.133             |
| Month 08              | 6.64 (2.24)      | 6.85 (2.65)      | -0.13 (-1.07, 0.80)        | 0.776             |
| Month 10              | 6.44 (2.45)      | 5.37 (1.74)      | 1.14 (0.21, 2.07)          | <b>0.017</b>      |
| Month 11              | 6.42 (1.77)      | 5.45 (1.69)      | 1.04 (0.11, 1.97)          | <b>0.029</b>      |
| <b>Phosphorus, mg</b> |                  |                  |                            |                   |
| Month 07              | 1023.06 (284.32) | 1004.05 (202.02) | 33.99 (-83.88, 151.87)     | 0.571             |
| Month 08              | 966.96 (257.85)  | 1106.43 (293.65) | -124.49 (-242.36, -6.62)   | <b>0.039</b>      |
| Month 10              | 984.67 (335.64)  | 930.98 (252.54)  | 68.68 (-49.20, 186.55)     | 0.252             |
| Month 11              | 989.53 (278.71)  | 988.18 (262.19)  | 16.33 (-101.54, 134.20)    | 0.785             |
| <b>Potassium, mg</b>  |                  |                  |                            |                   |
| Month 07              | 1666.69 (703.04) | 1962.08 (433.28) | -283.10 (-528.37, -37.83)  | <b>0.024</b>      |
| Month 08              | 1537.51 (481.42) | 2232.75 (761.17) | -682.95 (-928.21, -437.68) | <b>&lt;0.0001</b> |
| Month 10              | 1406.79 (493.64) | 1861.05 (503.26) | -441.97 (-687.24, -196.70) | <b>0.001</b>      |
| Month 11              | 1512.12 (526.22) | 1987.09 (511.40) | -462.67 (-707.94, -217.40) | <b>0.000</b>      |
| <b>Iron, mg</b>       |                  |                  |                            |                   |
| Month 07              | 10.62 (3.36)     | 6.23 (2.82)      | 4.58 (3.31, 5.85)          | <b>&lt;0.0001</b> |
| Month 08              | 10.80 (2.96)     | 6.90 (2.75)      | 4.10 (2.83, 5.37)          | <b>&lt;0.0001</b> |
| Month 10              | 9.83 (2.89)      | 5.64 (3.07)      | 4.38 (3.11, 5.65)          | <b>&lt;0.0001</b> |
| Month 11              | 10.26 (3.24)     | 5.24 (2.35)      | 5.21 (3.93, 6.48)          | <b>&lt;0.0001</b> |
| <b>Copper, mg</b>     |                  |                  |                            |                   |
| Month 07              | 0.62 (0.32)      | 0.60 (0.24)      | 0.04 (-0.08, 0.15)         | 0.524             |
| Month 08              | 0.60 (0.26)      | 0.68 (0.35)      | -0.06 (-0.18, 0.05)        | 0.255             |
| Month 10              | 0.63 (0.28)      | 0.50 (0.21)      | 0.15 (0.04, 0.26)          | <b>0.010</b>      |
| Month 11              | 0.60 (0.18)      | 0.53 (0.18)      | 0.09 (-0.02, 0.20)         | 0.115             |
| <b>Selenium, µg</b>   |                  |                  |                            |                   |
| Month 07              | 23.53 (13.95)    | 26.54 (14.20)    | -1.96 (-10.66, 6.75)       | 0.658             |
| Month 08              | 25.49 (21.96)    | 34.94 (36.19)    | -8.39 (-17.09, 0.31)       | 0.059             |
| Month 10              | 25.85 (17.66)    | 22.68 (13.11)    | 4.22 (-4.48, 12.92)        | 0.340             |
| Month 11              | 25.66 (19.68)    | 25.02 (13.39)    | 1.70 (-7.00, 10.40)        | 0.701             |
| <b>Iodine, µg</b>     |                  |                  |                            |                   |
| Month 07              | 64.08 (23.15)    | 52.65 (24.78)    | 11.80 (0.49, 23.11)        | <b>0.041</b>      |
| Month 08              | 63.58 (29.84)    | 55.72 (21.88)    | 8.22 (-3.09, 19.54)        | 0.154             |
| Month 10              | 60.53 (27.92)    | 53.13 (26.95)    | 7.77 (-3.55, 19.08)        | 0.178             |
| Month 11              | 65.92 (30.56)    | 53.53 (21.06)    | 12.76 (1.45, 24.07)        | <b>0.027</b>      |

EI: Energy intake; N/A: Not available.

\* Significant  $p$ -values are bold.

<sup>1</sup> Repeated measures mixed model with an autoregressive covariance structure, adjusting for sex.

<sup>2</sup> Only nutrients with significant relationships at any of the four time points are displayed.
